# Supplementary material for: Lung Cancer Incidence by Detailed Race–Ethnicity
Source: MDPI journal article supplement (doi:10.3390/cancers15072164), 2023-04-05
Supplement: s1 [file s1]

**Supplementary Table S1.** Age-Adjusted Incidence Rates of Lung Cancer (Overall, Histologically Confirmed Adenocarcinoma, Distant SEER Stage at Diagnosis, and Microscopically Verified Cases) by Detailed Race-Ethnicity and Sex. Florida, 2012–2018.

| Race-Ethnicity             | Overall Incidence Rate <sup>b</sup> (95% CI) |                     | Adenocarcinoma Histology Incidence Rate <sup>b</sup> (95% CI) |                     | Distant SEER Stage at Diagnosis Incidence Rate <sup>b</sup> (95% CI) |                     | Microscopically Verified Incidence Rate <sup>b</sup> (95% CI) |                     |
|----------------------------|----------------------------------------------|---------------------|---------------------------------------------------------------|---------------------|----------------------------------------------------------------------|---------------------|---------------------------------------------------------------|---------------------|
|                            | Male                                         | Female <sup>a</sup> | Male                                                          | Female <sup>a</sup> | Male                                                                 | Female <sup>a</sup> | Male                                                          | Female <sup>a</sup> |
| <b>Non-Hispanic White</b>  | 71.4 (70.8-72.1)                             | 61.0 (60.4-61.6)    | 27.2 (26.8-27.6)                                              | 28.4 (28.0-28.8)    | 33.7 (33.3-34.2)                                                     | 27.0 (26.6-27.4)    | 64.6 (64.0-65.2)                                              | 56.3 (55.7-56.8)    |
| <b>Non-Hispanic Black</b>  | 63.5 (61.8-65.3)                             | 36.0 (34.9-37.1)    | 24.9 (23.8-26.0)                                              | 17.3 (16.6-18.1)    | 32.6 (31.3-33.8)                                                     | 16.7 (15.9-17.4)    | 57.2 (55.5-58.9)                                              | 33.1 (32.0-34.2)    |
| US Born Black              | 81.7 (79.3-84.2)                             | 46.4 (44.8-48.0)    | 30.7 (29.3-32.2)                                              | 21.6 (20.6-22.7)    | 41.6 (39.9-43.4)                                                     | 21.3 (20.3-22.4)    | 73.3 (71.1-75.7)                                              | 42.7 (41.2-44.2)    |
| Caribbean-Born Black       | 26.2 (24.1-28.4)                             | 14.9 (13.6-16.3)    | 12.7 (11.3-14.3)                                              | 8.7 (7.7-9.8)       | 13.7 (12.3-15.3)                                                     | 7.2 (6.3-8.2)       | 23.9 (21.9-26.0)                                              | 13.2 (12.0-14.5)    |
| <b>Non-Hispanic API</b>    | 25.5 (23.2-27.9)                             | 18.8 (17.2-20.6)    | 13.9 (12.3-15.7)                                              | 12.8 (11.4-14.2)    | 14.3 (12.6-16.1)                                                     | 11.1 (9.8-12.5)     | 24.3 (22.1-26.6)                                              | 18.2 (16.6-19.9)    |
| <b>Hispanic</b>            | 49.8 (48.6-51.0)                             | 26.4 (25.7-27.1)    | 20.4 (19.6-21.1)                                              | 13.2 (12.7-13.8)    | 23.3 (22.5-24.1)                                                     | 11.7 (11.2-12.2)    | 45.0 (43.8-46.1)                                              | 23.8 (23.1-24.5)    |
| Mexican                    | 36.8 (31.7-42.4)                             | 16.8 (14.0-19.8)    | 13.2 (10.3-16.5)                                              | 8.2 (6.4-10.4)      | 18.2 (14.8-22.0)                                                     | 9.9 (7.8-12.2)      | 32.0 (27.3-37.1)                                              | 13.7 (11.3-16.5)    |
| US Born Mexican            | 59.8 (49.5-71.3)                             | 23.5 (18.5-29.2)    | 22.3 (16.4-29.4)                                              | 12.9 (9.4-17.1)     | 28.5 (21.7-36.4)                                                     | 13.3 (9.8-17.6)     | 52.9 (43.4-63.5)                                              | 21.1 (16.4-26.4)    |
| Foreign-Born Mexican       | 22.3 (17.4-28.2)                             | 12.2 (9.1-16.0)     | 7.4 (4.8-10.9)                                                | 5.1 (3.2-7.7)       | 11.7 (8.5-15.8)                                                      | 7.8 (5.3-11.0)      | 18.9 (14.5-24.2)                                              | 8.6 (6.2-11.8)      |
| Puerto Rican               | 43.7 (41.2-46.4)                             | 28.8 (27.1-30.7)    | 17.9 (16.3-19.6)                                              | 13.2 (12.0-14.5)    | 21.2 (19.5-23.0)                                                     | 13.2 (12.0-14.4)    | 39.8 (37.4-42.3)                                              | 26.2 (24.5-28.0)    |
| Cuban                      | 65.6 (63.6-67.6)                             | 31.7 (30.5-33.0)    | 25.3 (24.1-26.6)                                              | 15.5 (14.6-16.4)    | 30.1 (28.7-31.4)                                                     | 13.8 (12.9-14.6)    | 59.5 (57.6-61.4)                                              | 28.8 (27.6-30.0)    |
| Dominican                  | 44.2 (37.8-51.2)                             | 25.2 (21.8-29.1)    | 20.9 (16.7-25.8)                                              | 14.6 (12.0-17.6)    | 19.8 (15.7-24.6)                                                     | 10.4 (8.2-13.0)     | 38.7 (32.9-45.2)                                              | 22.4 (19.1-26.0)    |
| Central and South American | 30.8 (28.8-32.9)                             | 20.8 (19.5-22.2)    | 15.3 (13.9-16.8)                                              | 11.4 (10.5-12.4)    | 15.9 (14.4-17.4)                                                     | 9.8 (8.9-10.7)      | 27.9 (26.0-29.9)                                              | 18.6 (17.4-19.9)    |
| Central American           | 24.1 (20.6-28.1)                             | 16.3 (14.3-18.5)    | 10.6 (8.3-13.2)                                               | 8.0 (6.6-9.5)       | 13.0 (10.4-15.9)                                                     | 8.5 (7.0-10.1)      | 21.6 (18.3-25.3)                                              | 14.6 (12.7-16.7)    |
| South American             | 33.4 (31.0-36.0)                             | 22.9 (21.3-24.6)    | 17.2 (15.5-19.1)                                              | 13 (11.8-14.3)      | 17.1 (15.4-18.9)                                                     | 10.4 (9.3-11.6)     | 30.3 (28.1-32.8)                                              | 20.4 (18.9-22.0)    |

a. Includes n=39 identified as non-binary; b. Rates are annual, per 100,000, and age adjusted to the U.S. 2000 Standard Population. Abbreviation: CI, Confidence Interval; US, United States of America; API, Asian/Pacific Islander.
